# Supplementary material for: NH2-MIL-125(Ti)/Reduced Graphene Oxide Enhanced Electrochemical Detection of Fenitrothion in Agricultural Products
Source: MDPI journal article supplement (doi:10.3390/foods12071534), 2023-04-04
Supplement: s1 [file s1]

Electronic Supplementary Material For

# NH<sub>2</sub>-MIL-125(Ti)/Reduced Graphene Oxide Enhanced Electrochemical Detection of Fenitrothion in Agricultural Products

Zaixi Shu <sup>1,†</sup>, Yue Zou <sup>1,†</sup>, Xuyue Wu <sup>1</sup>, Qi Zhang <sup>2</sup>, Yafang Shen <sup>3</sup>, Anhong Xiao <sup>1</sup>, Shuo Duan <sup>1,4</sup>, Fuwei Pi <sup>1,5</sup>, Xiaodan Liu <sup>1</sup>, Jiahua Wang <sup>1</sup> and Huang Dai <sup>1,4,\*</sup>

<sup>1</sup> College of Food Science and Engineering, Wuhan Polytechnic University, Wuhan 430023, China

<sup>2</sup> School of Grain Science and Technology, Jiangsu University of Science and Technology, Zhenjiang 212004, China

<sup>3</sup> Zhejiang Institute of Freshwater Fisheries, Huzhou 313001, China

<sup>4</sup> Food Safety Research Center, Key Research Institute of Humanities and Social Sciences of Hubei Province, Wuhan 430023, China

<sup>5</sup> School of Food Science and Technology, Jiangnan University, Wuxi 214122, China

\* Correspondence: huangdai9@126.com; Tel.: +86 27 83924790

† These authors contributed equally to this work.

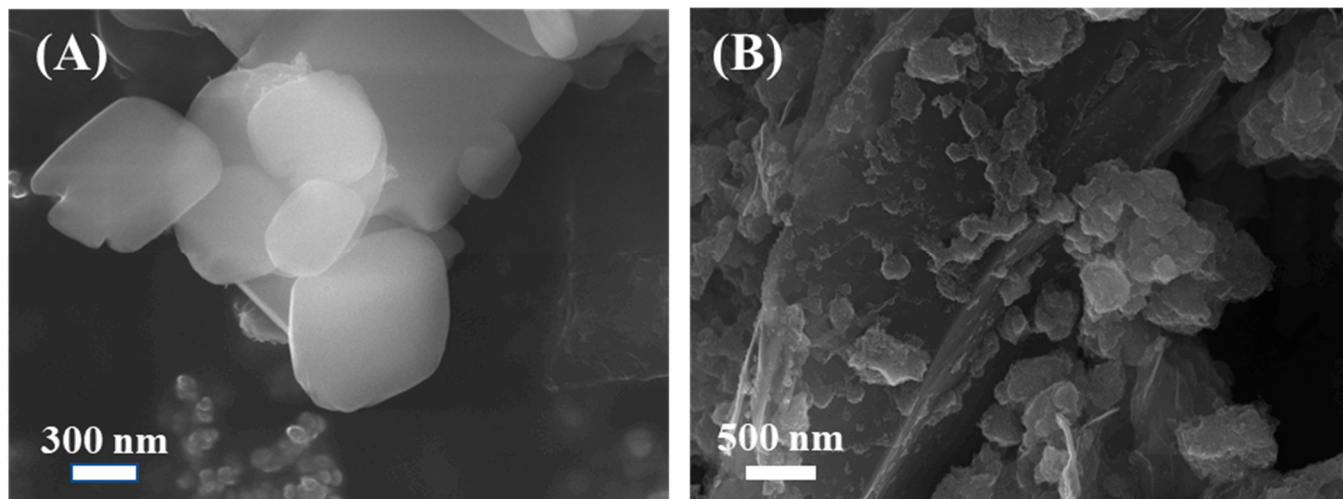

**Figure S1.** SEM images of (A)  $\text{NH}_2\text{-MIL-125(Ti)}$  and (B)  $\text{NH}_2\text{-MIL-125(Ti)/RGO}$

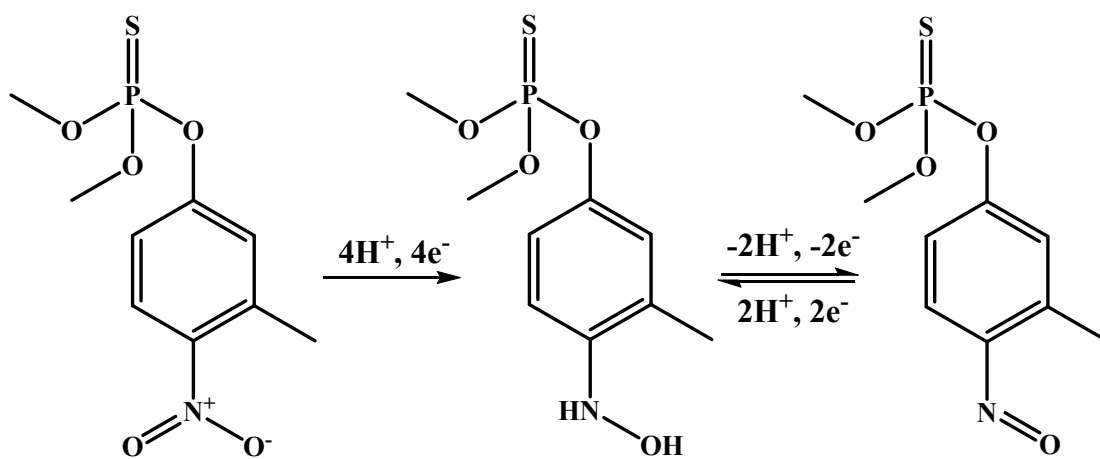

**Figure S2.** The electrochemical mechanism of the FT at the NH<sub>2</sub>-MIL-125(Ti)/RGO/GCE

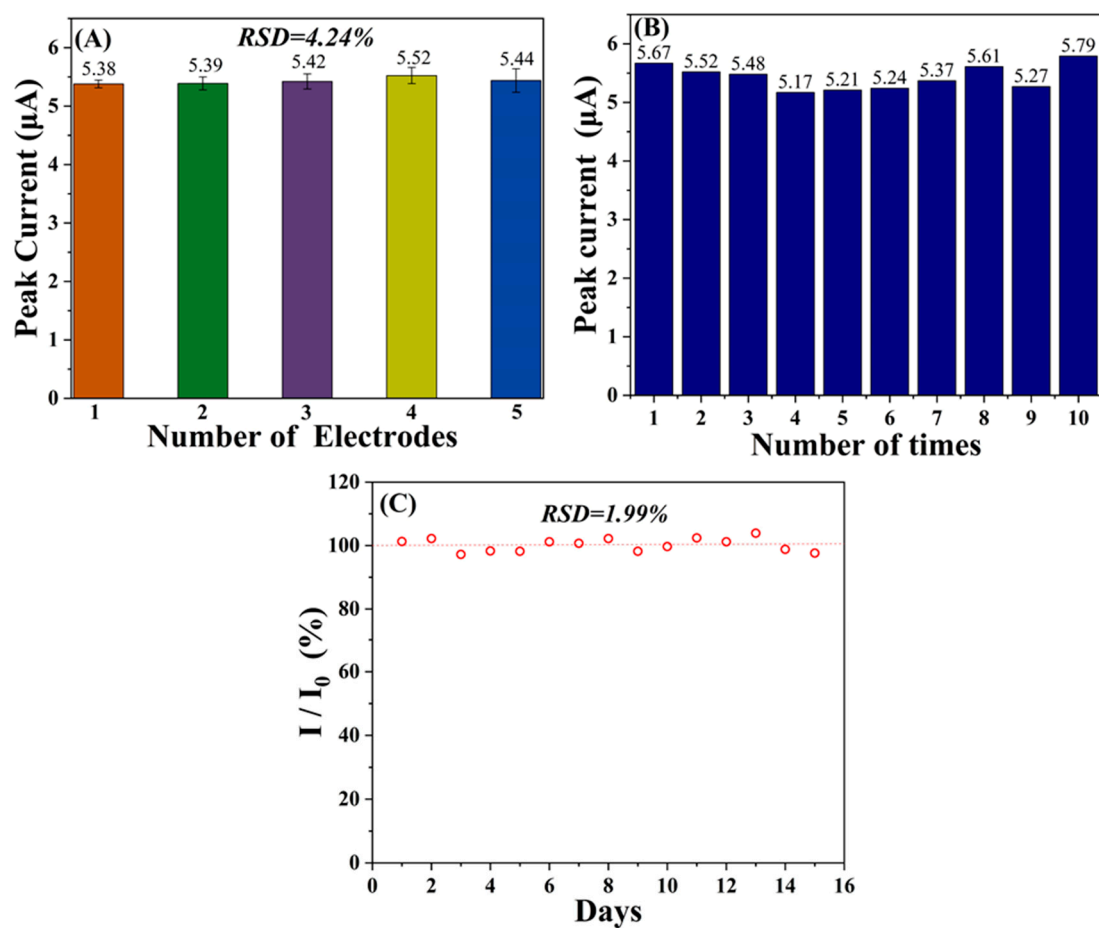

**Figure S3.** (A) Reproducibility, (B) Repeatability and (C) Stability measurements of 360 μM FT using the NH<sub>2</sub>-MIL-125(Ti)/RGO/GCE in 0.1 M PBS (pH 6.0).

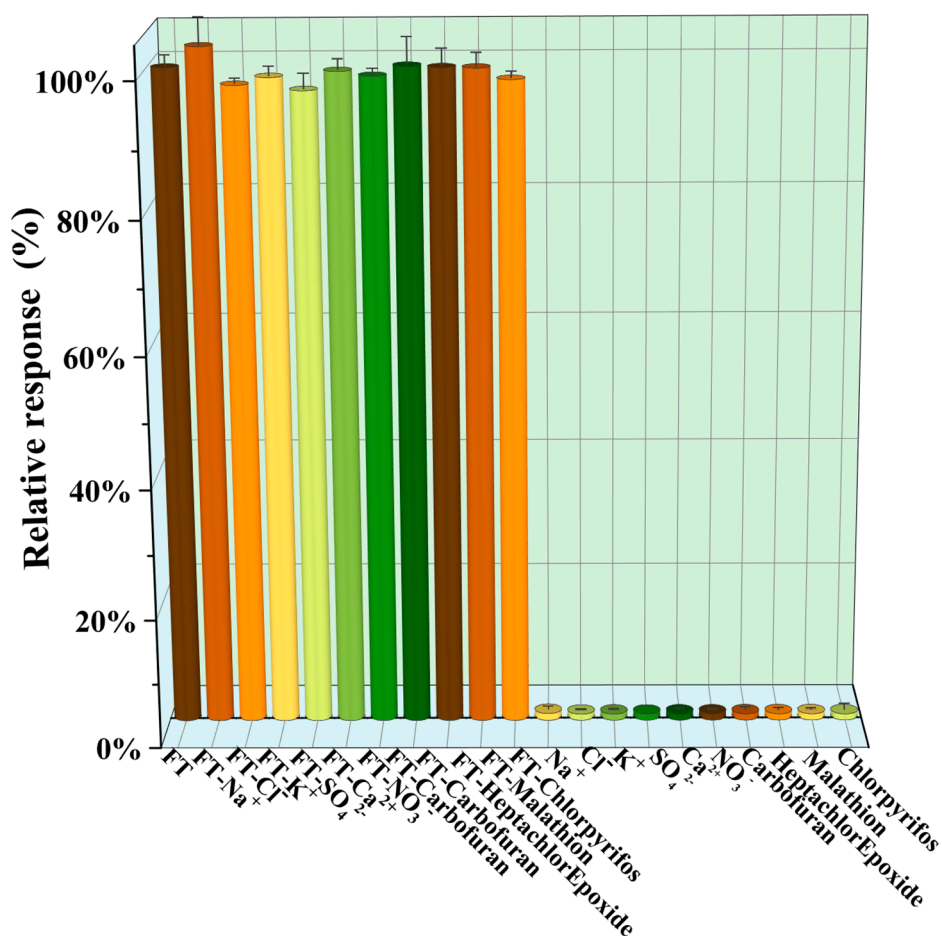

**Figure S4.** Selectivity of the developed electrochemical sensor for FT against other interferents. (from left to right: FT, FT-Na<sup>+</sup>, FT-Cl<sup>-</sup>, FT-K<sup>+</sup>, FT-SO<sub>4</sub><sup>2-</sup>, FT-Ca<sup>2+</sup>, FT-NO<sub>3</sub><sup>-</sup>, FT-Carbofuran, FT-Trans-Heptachlor Epoxide, FT-Malathion, FT-Chlorpyrifos, Na<sup>+</sup>, Cl<sup>-</sup>, K<sup>+</sup>, SO<sub>4</sub><sup>2-</sup>, Ca<sup>2+</sup>, NO<sub>3</sub><sup>-</sup>, Carbofuran, Trans-Heptachlor Epoxide, Malathion, Chlorpyrifos). The concentration is 360  $\mu$ M for FT and 3.6 mM for other interferents. The error lines indicates the mean standard error of the three measurements. The error bars represent average standard error for three measurements.

**Table S1** Comparative study of performances of different electrochemical sensors for detection of FT

| No. | Materials used                                 | Sample                                                                                  | Linear Ranges<br>( $\mu\text{M}$ ) | LOD<br>( $\mu\text{M}$ ) | Ref.      |
|-----|------------------------------------------------|-----------------------------------------------------------------------------------------|------------------------------------|--------------------------|-----------|
| 1   | Poly(purpald)-PGE                              | apple juice, water                                                                      | 25–200                             | 17.39                    | [1]       |
| 2   | TiO <sub>2</sub> /Nafion/GCE                   | water                                                                                   | 0.2–4                              | 0.0866                   | [2]       |
| 3   | PHA/mPEG/SPE                                   | tap water                                                                               | 1–10                               | 0.61                     | [3]       |
| 4   | MWCNTs-GCE                                     | river water                                                                             | 0.2–60                             | 0.08                     | [4]       |
| 5   | Pretreated GCE                                 | tap water,<br>human urine                                                               | 0.4–50                             | 0.078                    | [5]       |
| 6   | Ni(II) MIP-SPCE                                | forest matrices                                                                         | 3.00–100                           | 0.08                     | [6]       |
| 7   | CoPc/GCE                                       | /                                                                                       | 1.20–42.0                          | 0.46                     | [7]       |
| 8   | SiO <sub>2</sub> /CNTs/RuPc                    | orange juice                                                                            | 3–66                               | 0.162                    | [8]       |
| 9   | SWCNH-ZE/GCE                                   | natural water,<br>orange juice                                                          | 0.99–12                            | 0.012                    | [9]       |
| 10  | IL@CoFe <sub>2</sub> O <sub>4</sub> NPs@MWCNTs | fruit extract                                                                           | 0.02–160                           | 0.0135                   | [10]      |
| 11  | NH <sub>2</sub> -MIL-125(Ti)/RGO               | agricultural<br>products extract<br>(rice, wheat, grape,<br>peach, cucumber,<br>tomato) | 0.072–18                           | 0.0338                   | This work |

CV: cyclic voltammetry; EIS: electrochemical impedance spectroscopy; DPV: differential pulse voltammetry; PGE: pencil graphite electrode; GR: graphene; GCE: glassy carbon electrode; MWCNTs: multi-walled carbon nanotubes; RGO: reduced graphene oxide; SPCE: Screen Printed Carbon Electrodes; AuNPs: gold nanoparticles; CNTs: carbon nanotubes; RuPc: ruthenium phthalocyanine; ZE: zein; IL: ionic liquid; CoFe<sub>2</sub>O<sub>4</sub>NPs: cobalt ferrite nanoparticles; mPEG: poly(ethylene glycol) methyl ether; PHA: polyhydroxyalkanoates; CoPc: Cobalt phthalocyanine.

## References

1. Soysal M. Voltammetric determination of fenitrothion based on pencil graphite electrode modified with poly(Purpald((R))). *Chem. Pap.* **2019**, 73(7), 1785-1794.
2. Kumaravel A.; Chandrasekaran M. A biocompatible nano TiO<sub>2</sub>/nafion composite modified glassy carbon electrode for the detection of fenitrothion. *J. Electroanal. Chem.* **2011**, 650(2), 163-170.
3. Sgobbi L.F.; Machado S.A.S. Functionalized polyacrylamide as an acetylcholinesterase-inspired biomimetic device for electrochemical sensing of organophosphorus pesticides. *Biosens. Bioelectron.* **2018**, 100, 290-297.
4. Salehzadeh H.; Ebrahimi M.; Nematollahi D.; Salarian A.A. Electrochemical study of fenitrothion and bifenox and their simultaneous determination using multiwalled carbon nanotube modified glassy carbon electrode. *J. Electroanal. Chem.* **2016**, 767, 188-194.
5. Geremedhin W.; Amare M.; Admassie S. Electrochemically pretreated glassy carbon electrode for electrochemical detection of fenitrothion in tap water and human urine. *Electrochim. Acta* **2013**, 87, 749-755.
6. Pellicer C.; Gomez-Caballero A.; Unceta N.; Goicolea M.A.; Barrio R.J. Using a portable device based on a screen-printed sensor modified with a molecularly imprinted polymer for the determination of the insecticide fenitrothion in forest samples. *Anal. Methods* **2010**, 2(9), 1280-1285.
7. Akyüz D.; Keleş T.; Biyiklioglu Z.; Koca A. Electrochemical pesticide sensors based on electropolymerized metallophthalocyanines. *J. Electroanal. Chem.* **2017**, 804, 53-63.
8. Canevari T.C.; Prado T.M.; Cincotto F.H.; Machado S.A.S. Immobilization of ruthenium phthalocyanine on silica-coated multi-wall partially oriented carbon nanotubes: Electrochemical detection of fenitrothion pesticide. *Mater. Res. Bull.* **2016**, 76, 41-47.
9. Itkes M.P.M.; De Oliveira G.G.; Silva T.A.; Fatibello O.; Janegitz B.C. Voltammetric sensing of fenitrothion in natural water and orange juice samples using a single-walled carbon nanohorns and zein modified sensor. *J. Electroanal. Chem.* **2019**, 840, 21-26.
10. Kilele J.C.; Chokkareddy R.; Redhi G.G. Ultra-sensitive electrochemical sensor for fenitrothion pesticide residues in fruit samples using IL@CoFe<sub>2</sub>O<sub>4</sub>NPs@MWCNTs nanocomposite. *Microchem. J.* **2021**, 164, 106012.
